# Supplementary material for: Gradient adhesion modification of polyacrylamide/alginate–calcium tough hydrogels
Source: Royal Society of Chemistry journal article supplement (doi:10.1039/d1tb02599f), 2021-12-20
Supplement: d1tb02599f1.pdf [file d1tb02599f1.pdf]

Supporting Information

**Gradient adhesion modification of polyacrylamide/alginate-calcium tough hydrogels**

Wanglong Zhang, Yiwei Zhang, Yu Dai, Fan Xia, Xiaojin Zhang\*

State Key Laboratory of Biogeology and Environmental Geology, Engineering Research Center of Nano-Geomaterials of Ministry of Education, Faculty of Materials Science and Chemistry, China University of Geosciences, Wuhan 430074, China

E-mail: zhangxj@cug.edu.cn

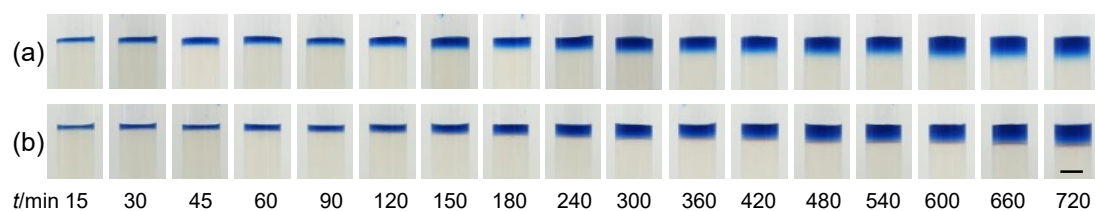

**Fig. S1.** Images of EDTA diffusion at regular intervals in (a) PAAm/Alg hydrogel and (b) PAAm/Alg- $\text{Ca}^{2+}$  hydrogel. Scale bar: 1 cm.

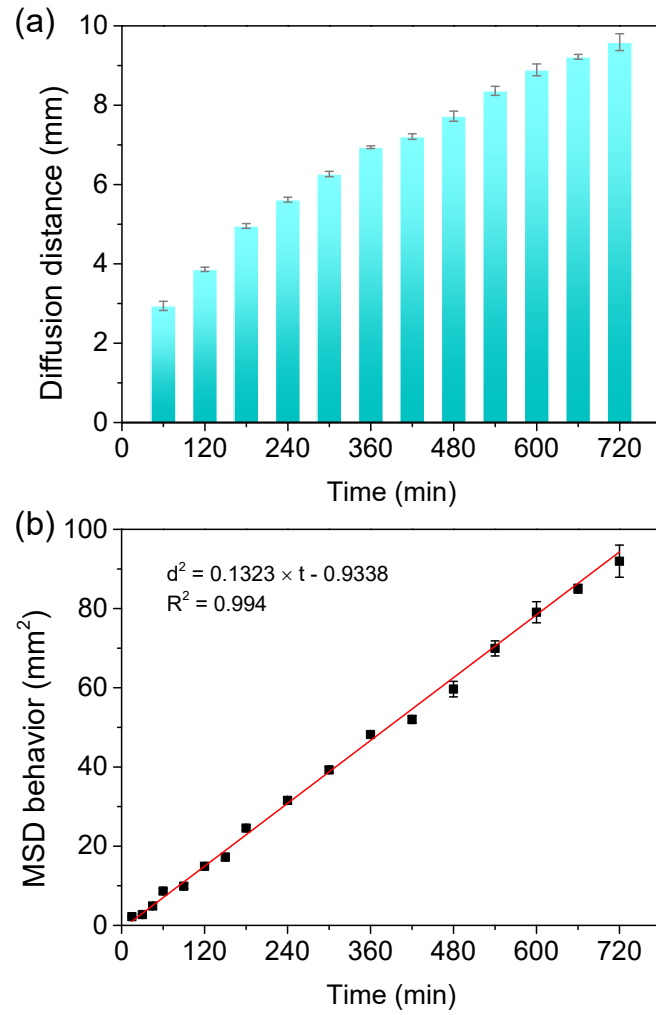

**Fig. S2.** (a) Diffusion distance of EDTA in PAAm/Alg-Ca<sup>2+</sup> hydrogel with diffusion time. (b) MSD behavior with diffusion time.

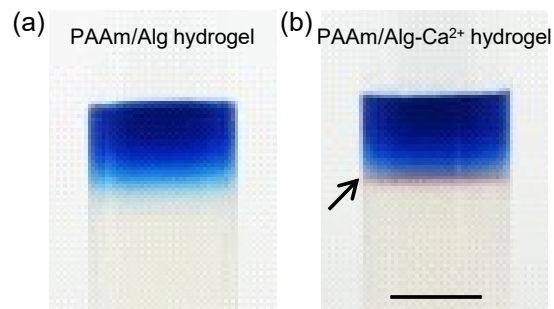

**Fig. S3.** Enlarged images of EDTA diffusion for 12 h in (d) PAAm/Alg hydrogel and (e) PAAm/Alg-Ca<sup>2+</sup> hydrogel. The arrow points to a red line. Scale bar: 1 cm.

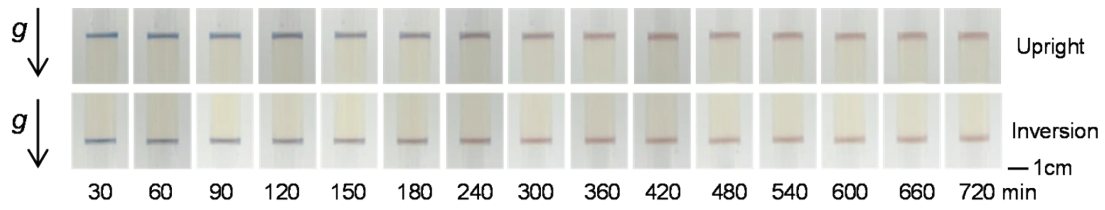

**Fig. S4.** After 5 min of EDTA diffusion, images of the hydrogel in the upright and inverted state at fixed intervals.

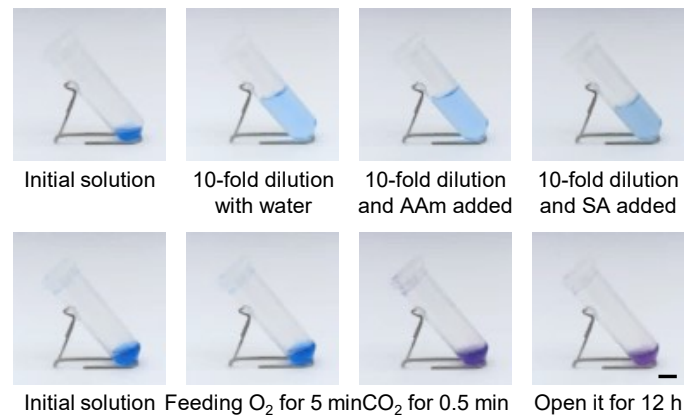

**Fig. S5.** Images of some solutions to explore the factors affecting red line broadening in PAAm/Alg-Ca<sup>2+</sup> hydrogel. Scale bar: 1 cm.

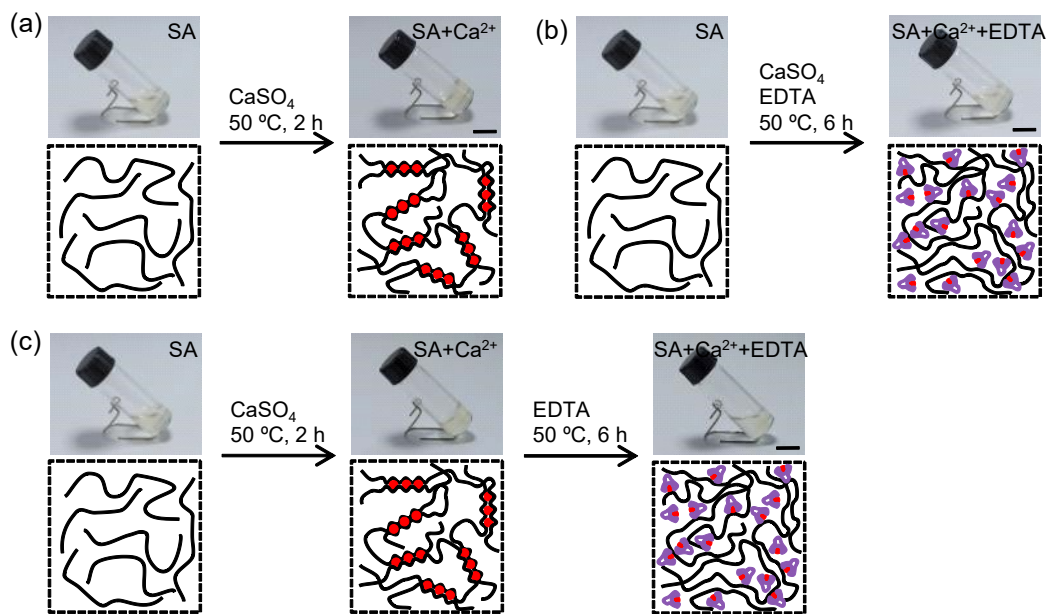

**Fig. S6.** (a) Image and schematic illustration of the hydrogel formed by SA and Ca<sup>2+</sup>. (b) Image and schematic illustration of the solution formed by SA, Ca<sup>2+</sup>, and EDTA.

(c) Image and schematic illustration of gel-sol transition formed by SA, Ca<sup>2+</sup>, and EDTA.

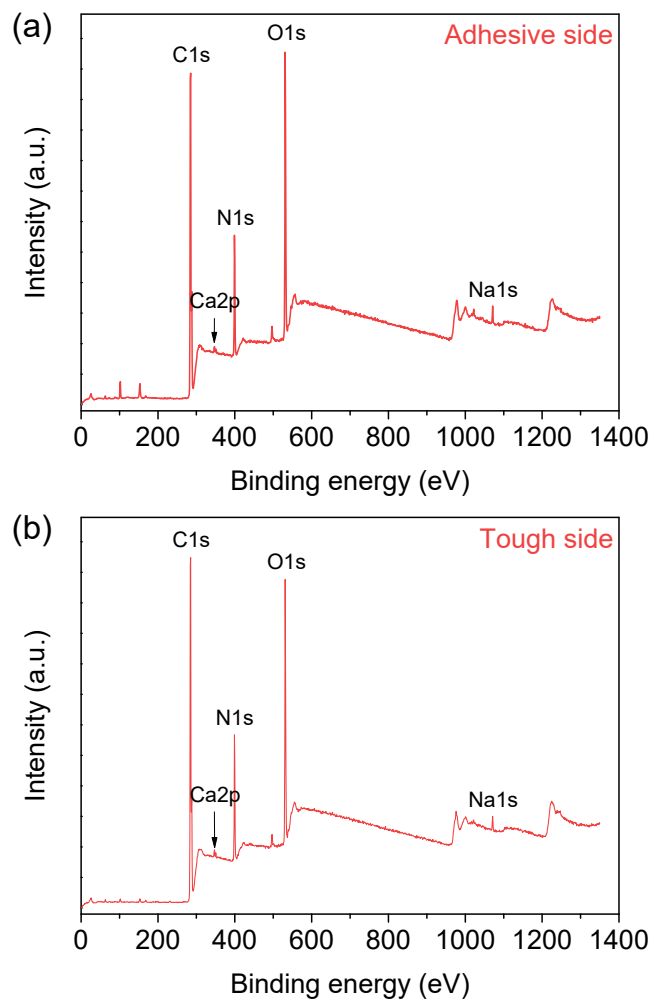

**Fig. S7.** XPS wide-scan spectra of (a) adhesive side and (b) tough side.

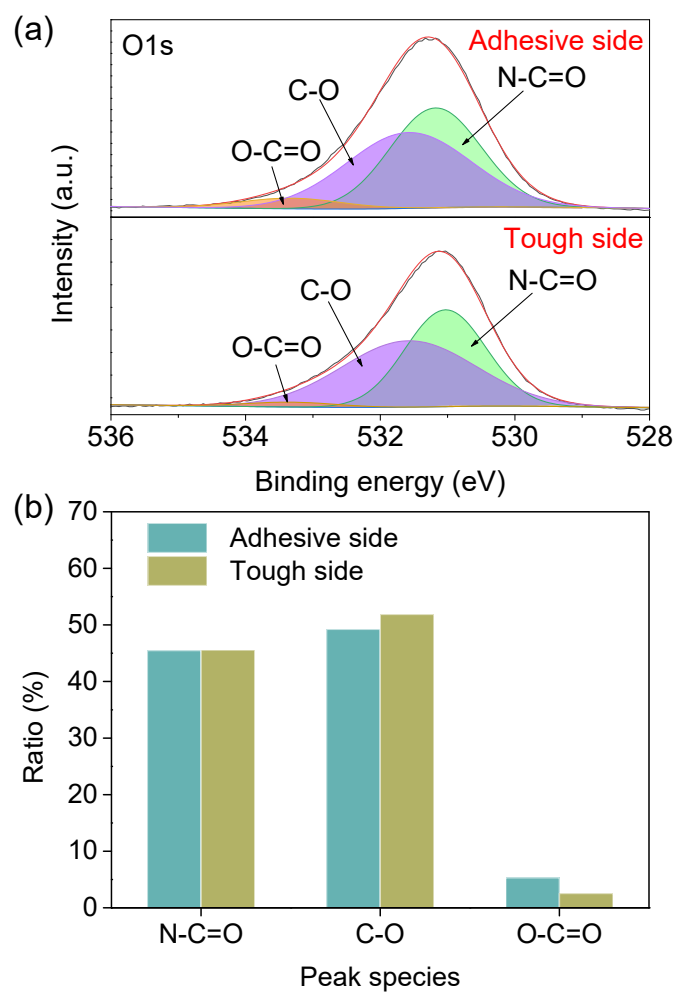

**Fig. S8.** (a) O1s core-level spectrum and (b) the corresponding peak species ratio of adhesive side and tough side.

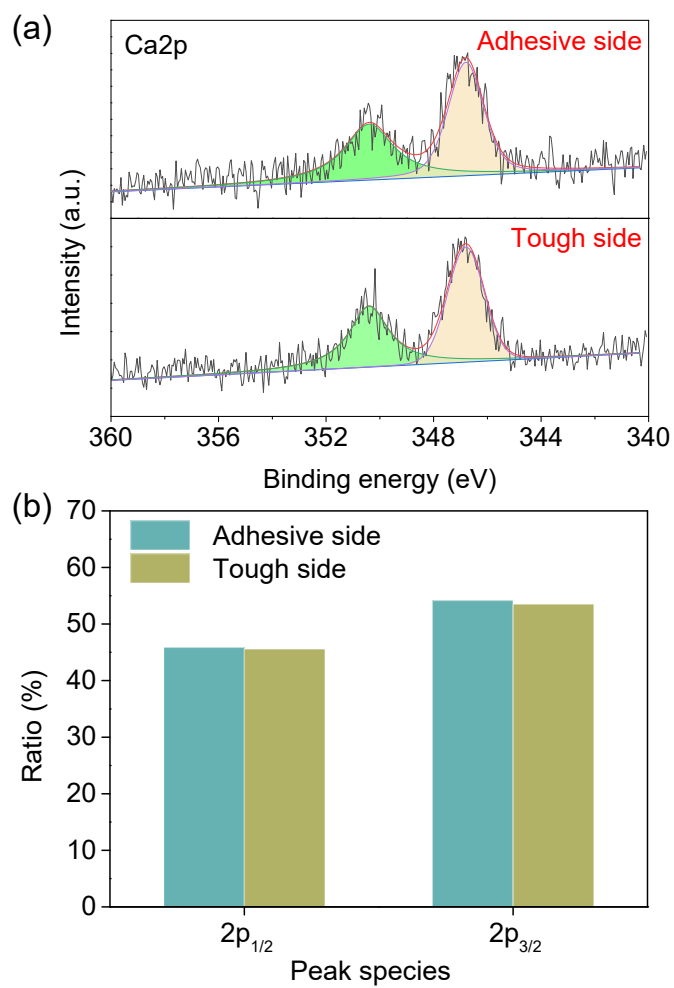

**Fig. S9.** (a) Ca2p core-level spectra and (b) the corresponding peak species ratio of adhesive side and tough side.

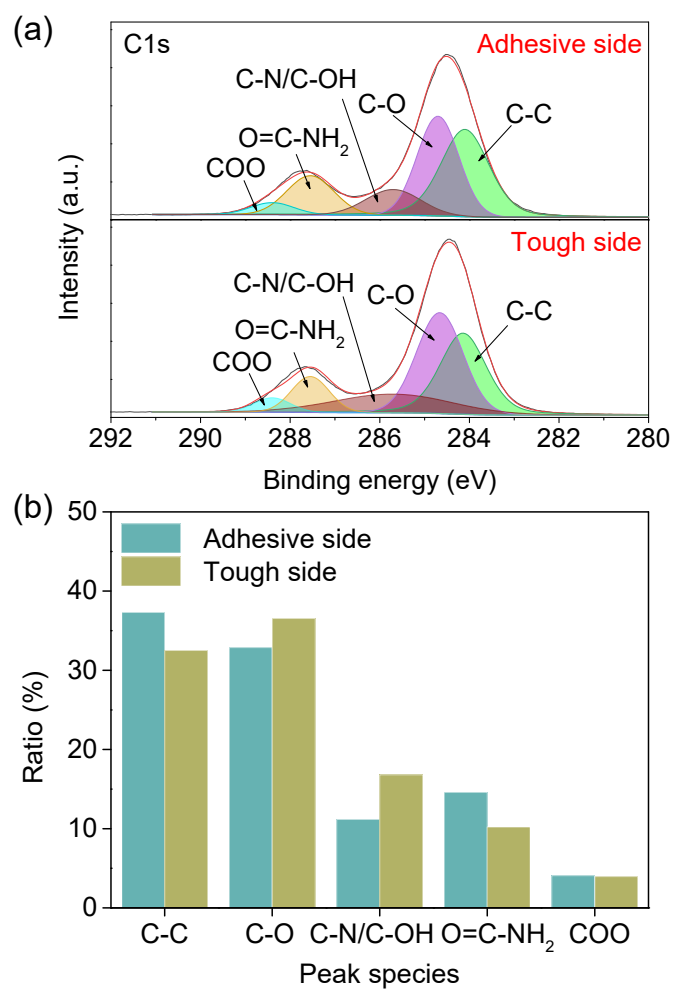

**Fig. S10.** (a) C1s core-level spectra and (b) the corresponding peak species ratio of adhesive side and tough side.

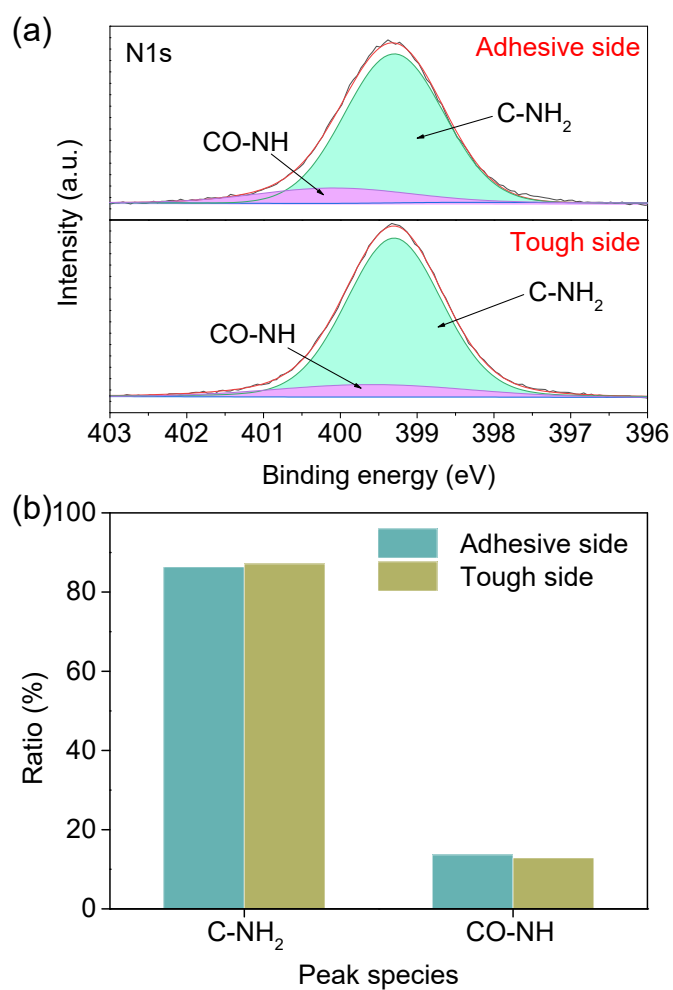

**Fig. S11.** (a) N1s core-level spectra and (b) the corresponding peak species ratio of adhesive side and tough side.

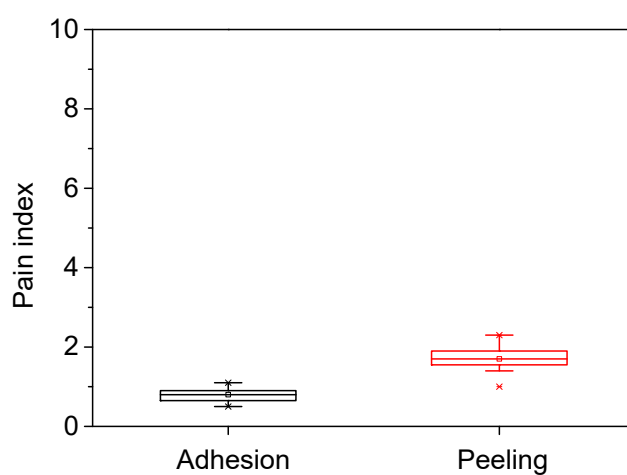

**Fig. S12.** Pain test on adhesion and peeling process of gradient adhesive-tough hydrogel onto skin (20 volunteers).



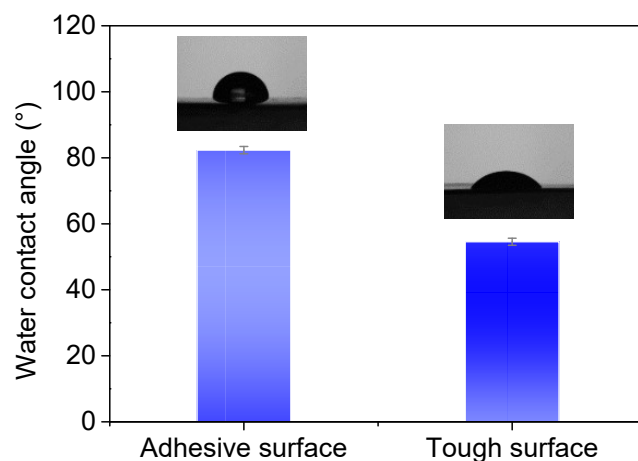

**Fig. S13.** Water contact angle of adhesive surface and tough surface.  $n = 4$  per group. Data are mean $\pm$ s.d.

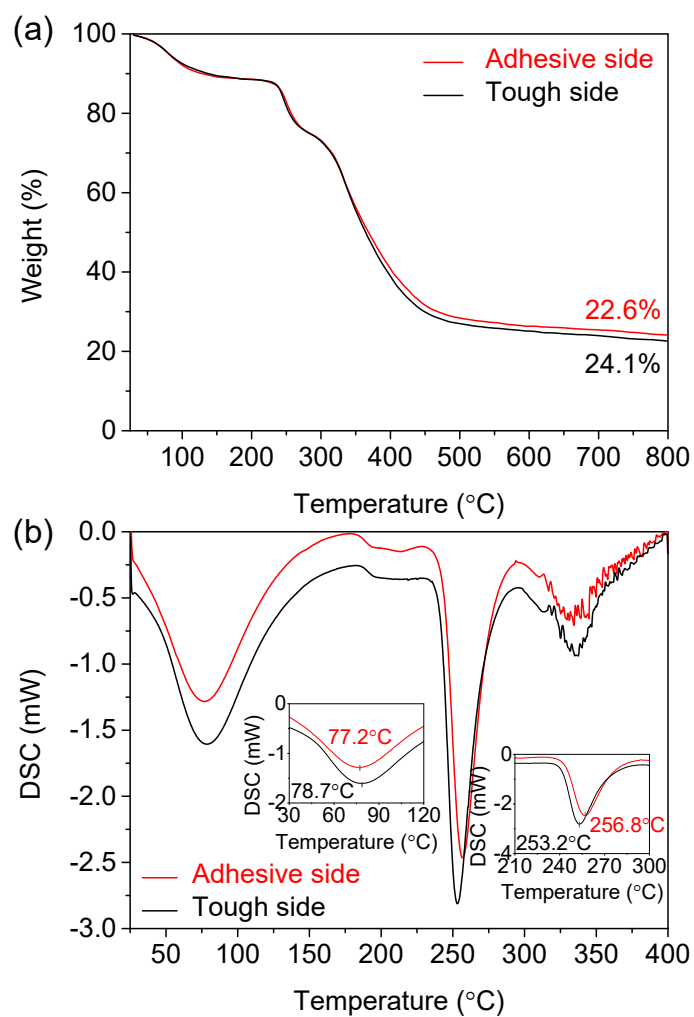

**Fig. S14.** (a) TG curve and (b) DSC curve of adhesive side and tough side.

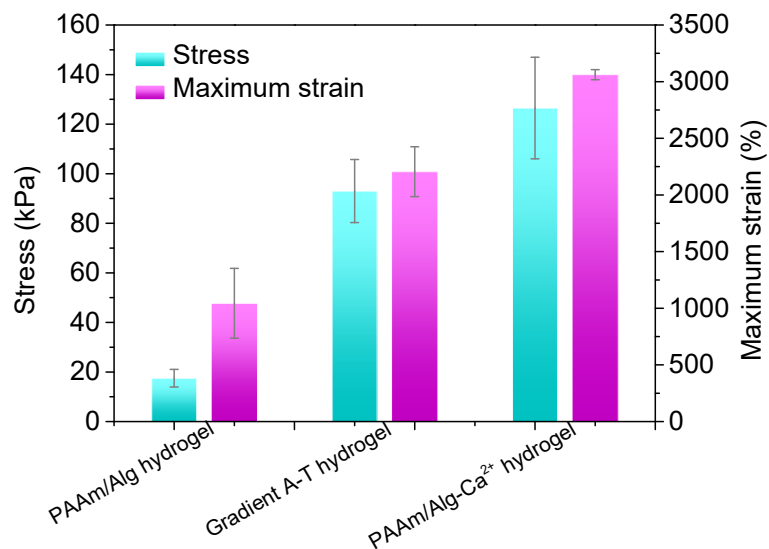

**Fig. S15.** Stress and maximum strain of hydrogels.

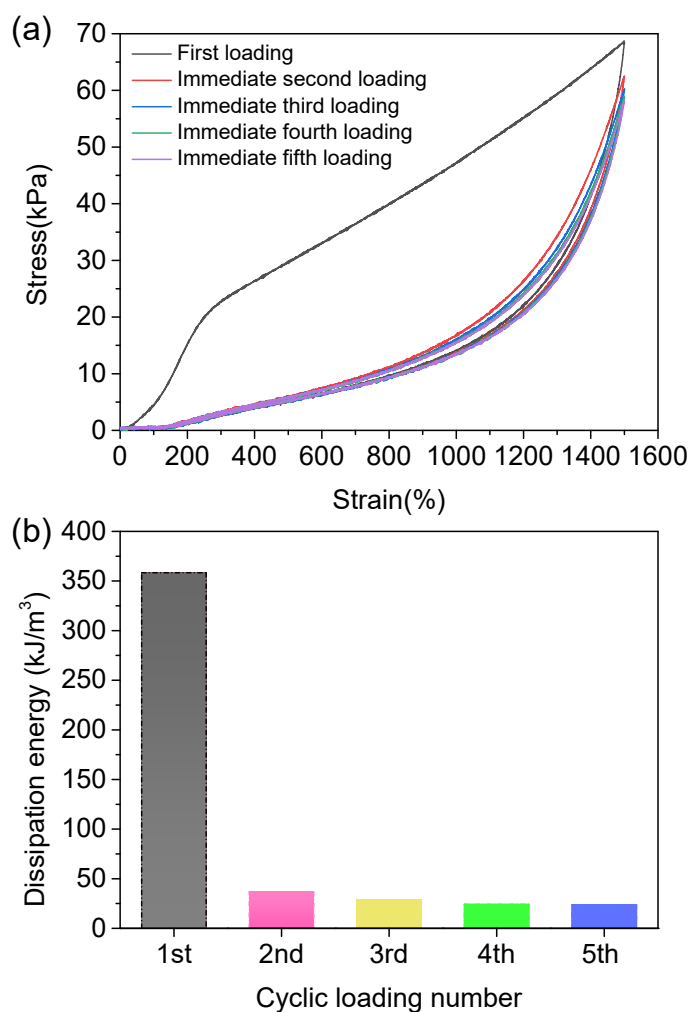

**Fig. S16.** (a) Successive loading-unloading curves and (b) the corresponding dissipation energy of gradient adhesive-tough hydrogel with no resting time.

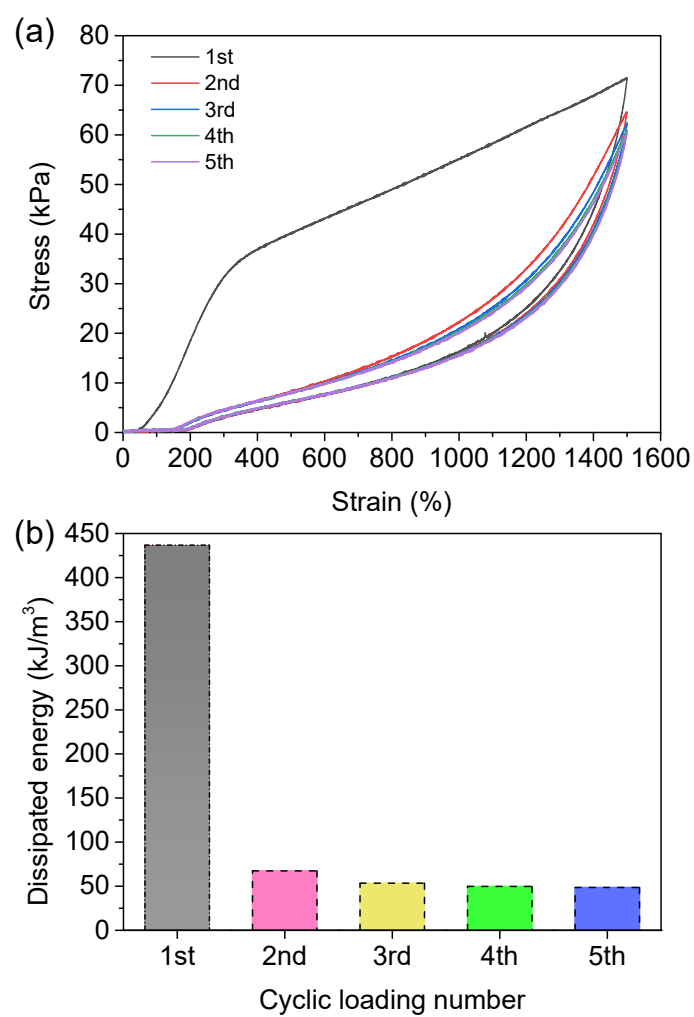

**Fig. S17.** (a) Loading-unloading curves and (b) the corresponding dissipation energy of gradient adhesive-tough hydrogel with 10 min recovery.

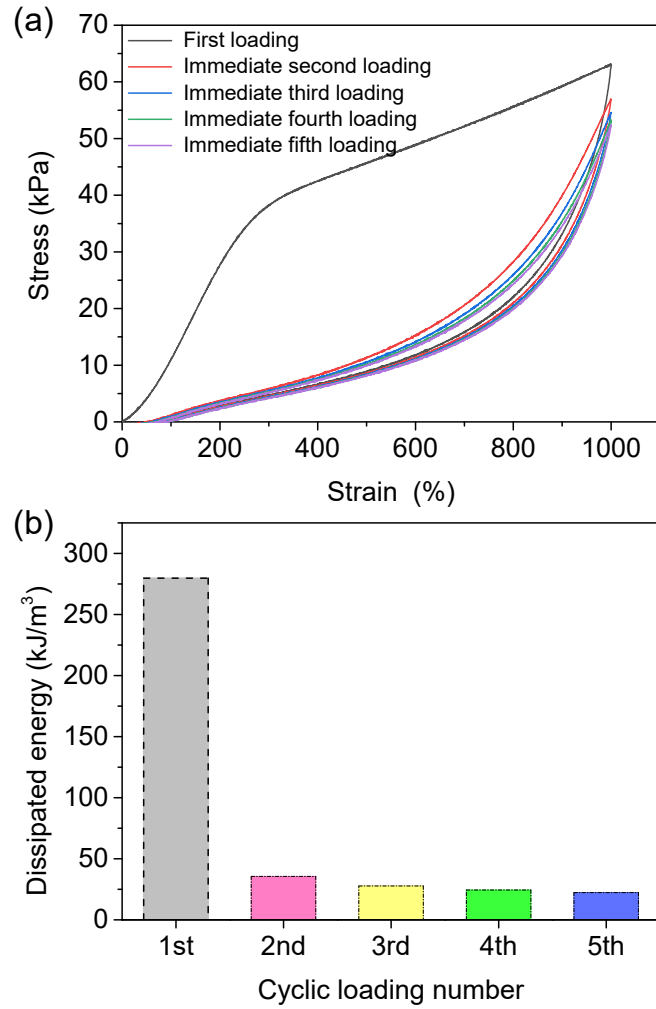

**Fig. S18.** (a) Successive loading-unloading curves and (b) the corresponding dissipation energy of PAAm/Alg-Ca<sup>2+</sup> hydrogel with no resting time.

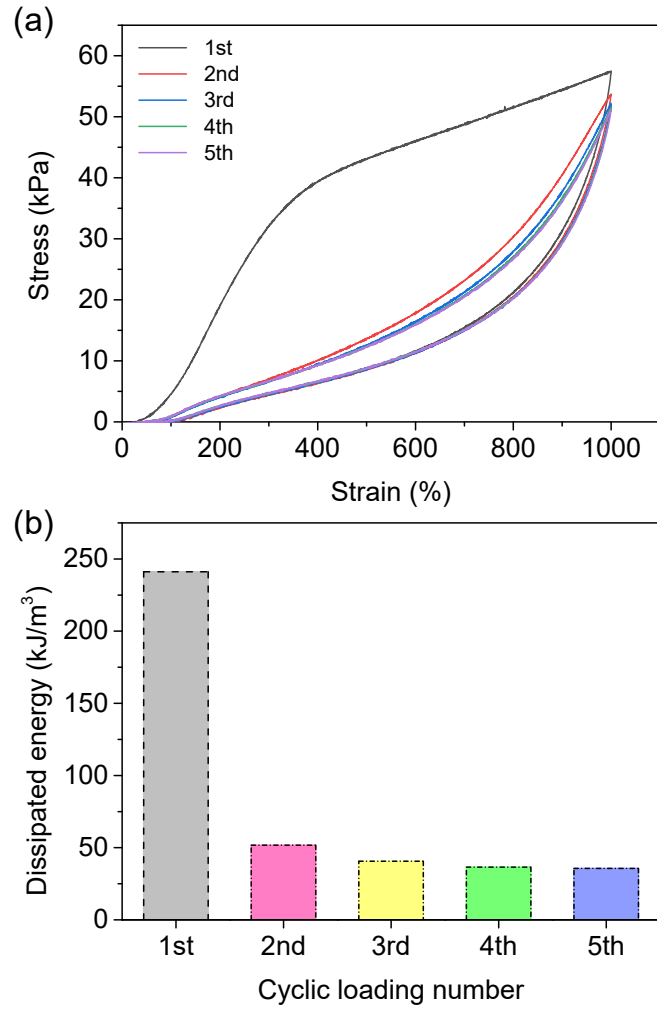

**Fig. S19.** (a) Loading–unloading curves and (b) the corresponding dissipation energy of PAAm/Alg-Ca<sup>2+</sup> hydrogel with 10 min recovery.

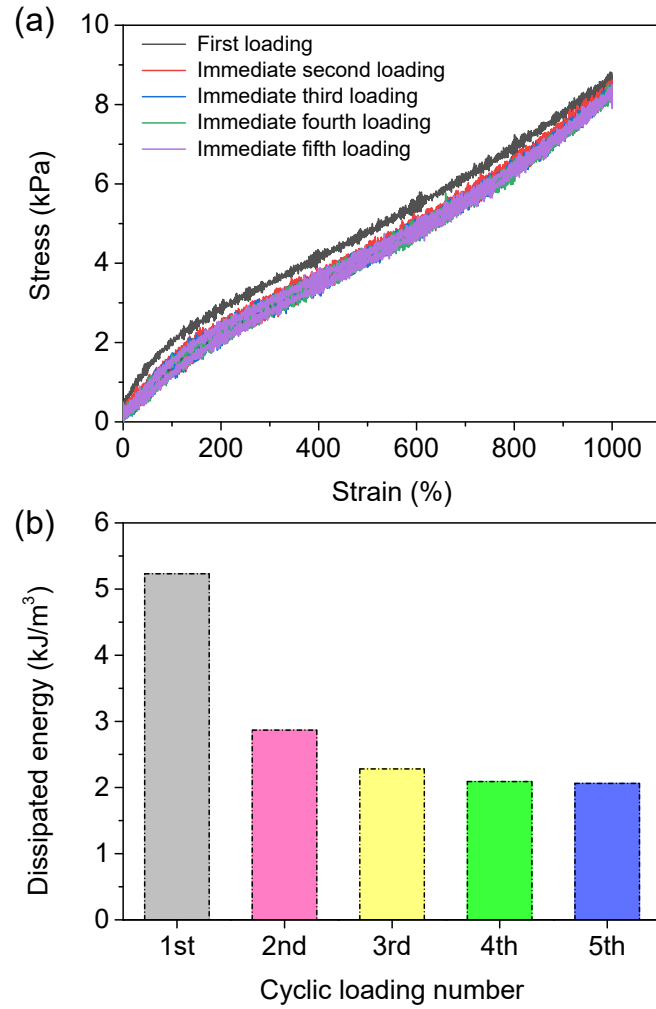

**Fig. S20.** (a) Successive loading-unloading curves and (b) the corresponding dissipation energy of PAAm/Alg hydrogel with no resting time.

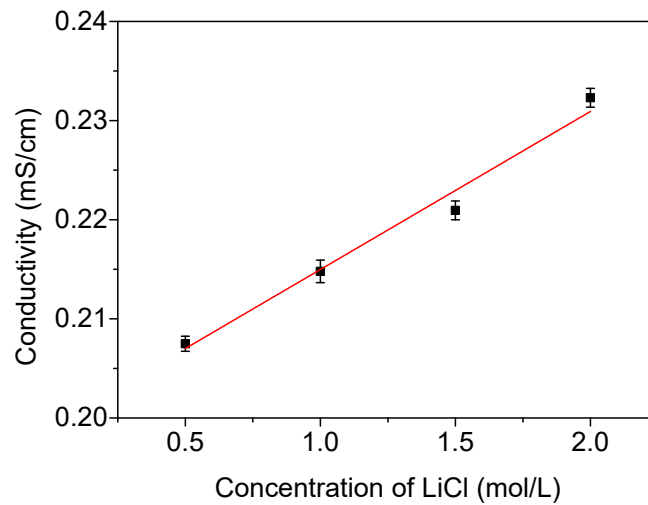

**Fig. S21.** The conductivity of gradient adhesive-tough hydrogel as a positive

proportional function of the concentration of LiCl.

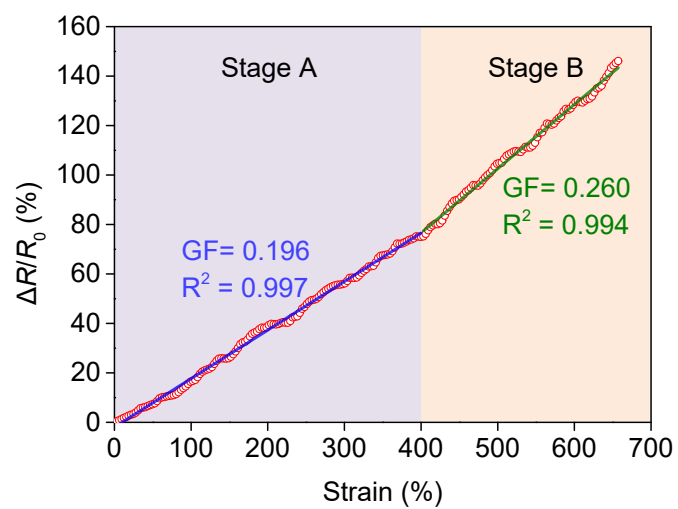

**Fig. S22.** The relative resistance change of the hydrogel sensor as a function of the applied strain. The gauge factor (GF) can be determined from the slope of the fitted curve.
